# Supplementary material for: Novel comparison of crystal packing by moments of inertia
Source: Royal Society of Chemistry journal article supplement (doi:10.1039/c0ce00408a), 2010-10-06

## Supporting Information for

### Novel Comparison of crystal packing by moments of inertia P. T. A. Galek

**Fig S1.** Overlay of the common molecular dimer found in carbamazepine form IV (CBMZPN12) and DUPTEN

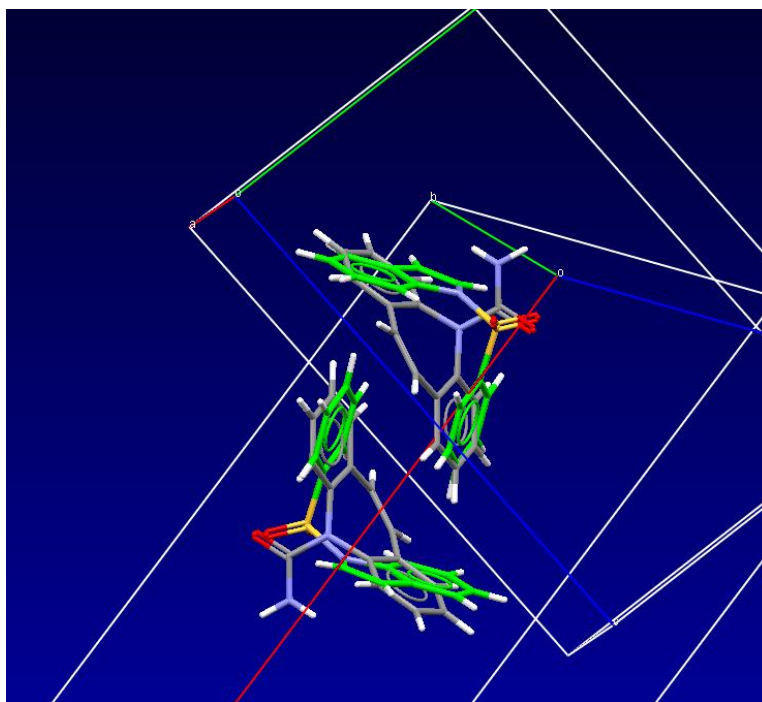

**Fig S2.** Overlay of the common molecular dimer found in carbamazepine form VI (CBMZPN12) and ADEDIX.

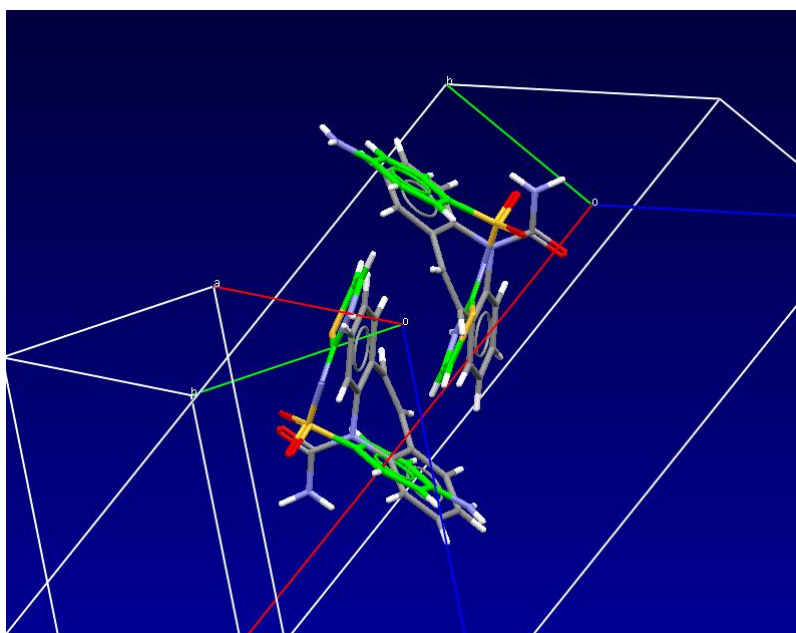

Supplement: c0ce00408a.pdf [file c0ce00408a.pdf]
